# Supplementary material for: Different structural transitions of rapidly supercooled tantalum melt under pressure
Source: Royal Society of Chemistry journal article supplement (doi:10.1039/d0cp01432j), 2020-01-01
Supplement: d0cp01432j1.pdf [file d0cp01432j1.pdf]

Fig. S1 :

We have performed the rapid solidification for Ta at a lower cooling rate  $1.25 \times 10^{11}$  K/s under [0, 10] GPa. In most cases, the bcc crystal is obtained, as shown in Fig. S1.

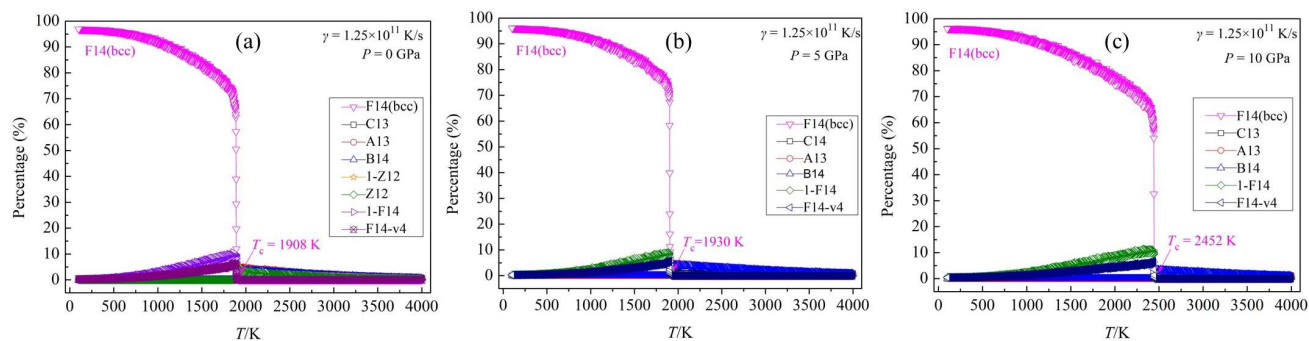

Fig. S1 the structure evolution during the rapid cooling at a cooling rate of  $1.25 \times 10^{11}$  K/s under different pressures.
